# Supplementary material for: Environment-Friendly Catalytic Mineralization of Phenol and Chlorophenols with Cu- and Fe- Tetrakis(4-aminophenyl)-porphyrin—Silica Hybrid Aerogels
Source: MDPI journal article supplement (doi:10.3390/gels8040202), 2022-03-23
Supplement: s1 [file s1]

Supplementary Materials

# Environment-Friendly Catalytic Mineralization of Phenol and Chlorophenols with Cu- and Fe- Tetrakis(4-aminophenyl)-porphyrin – Silica Hybrid Aerogels

Enikő Győri <sup>1</sup>, Ádám Kecskeméti <sup>1</sup>, István Fábián <sup>1,2</sup>, Máté Szarka <sup>3,4</sup> and István Lázár <sup>1,\*</sup>

- <sup>1</sup> Department of Inorganic and Analytical Chemistry, University of Debrecen, Egyetem tér 1, H-4032 Debrecen, Hungary; gyori.eniko@science.unideb.hu (E.G.); kecskemeti.adam@science.unideb.hu (Á.K.); ifabian@science.unideb.hu (I.F.)
  - <sup>2</sup> MTA-DE Redox and Homogeneous Catalytic Reaction Mechanisms Research Group, University of Debrecen, Debrecen Egyetem tér 1 H-4032 Debrecen, Hungary
  - <sup>3</sup> Institute for Nuclear Research, Debrecen Bem tér 18/c, H-4026 Debrecen, Hungary; szarka.mate@atomki.hu (M.S.)
  - <sup>4</sup> Vitrolink Kft., Debrecen, Sárosi utca 9 H-4033 Debrecen, Hungary
- \* Correspondence: lazar@science.unideb.hu; Tel.: +36-52-512-900-22376

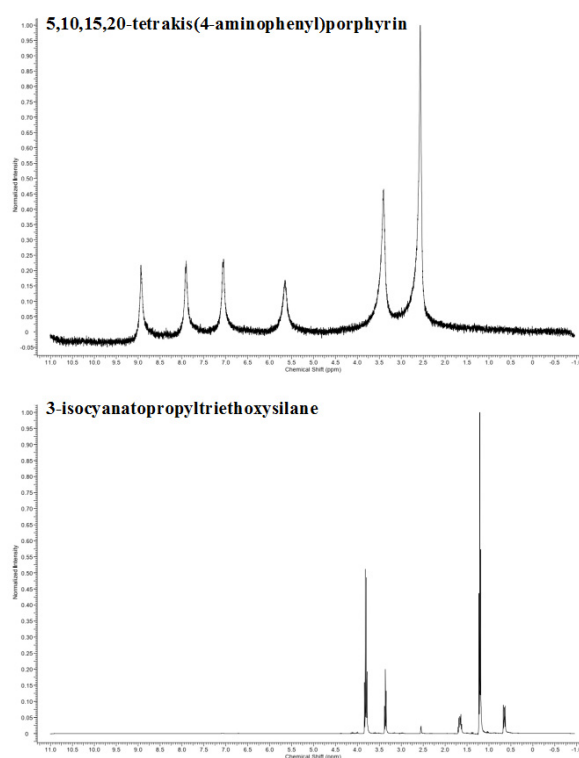

**Figure S1.** <sup>1</sup>H NMR spectra of the 5,10,15,20-tetrakis(4-aminophenyl)porphyrin and the coupling agent: 3-isocyanatopropyltriethoxysilane.

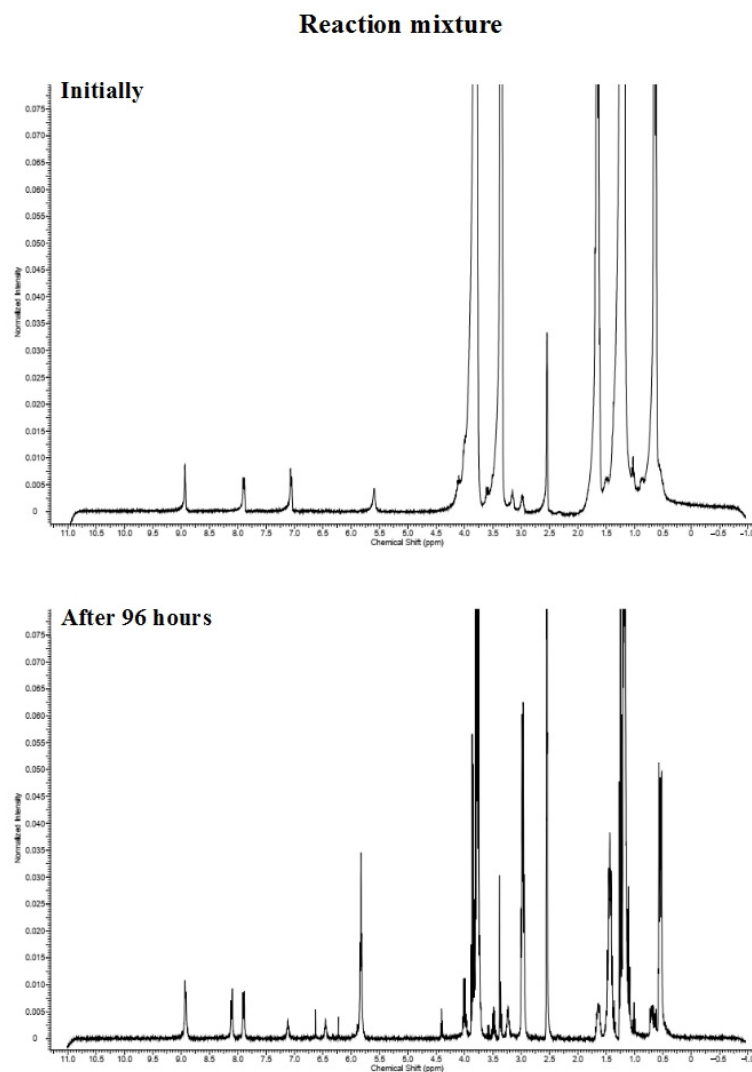

**Figure S2.**  $^1\text{H}$  NMR spectra of the mixture of 5,10,15,20-tetrakis(4-aminophenyl)porphyrin and the coupling agent 3-isocyanatopropyltriethoxysilane. The spectra of the reaction mixture were recorded directly after mixing and after 96 hours reaction time. The changes – especially in the aromatic region – in the spectra indicate change in the chemical structure of the porphyrin ring, meaning that the functionalization was successful.

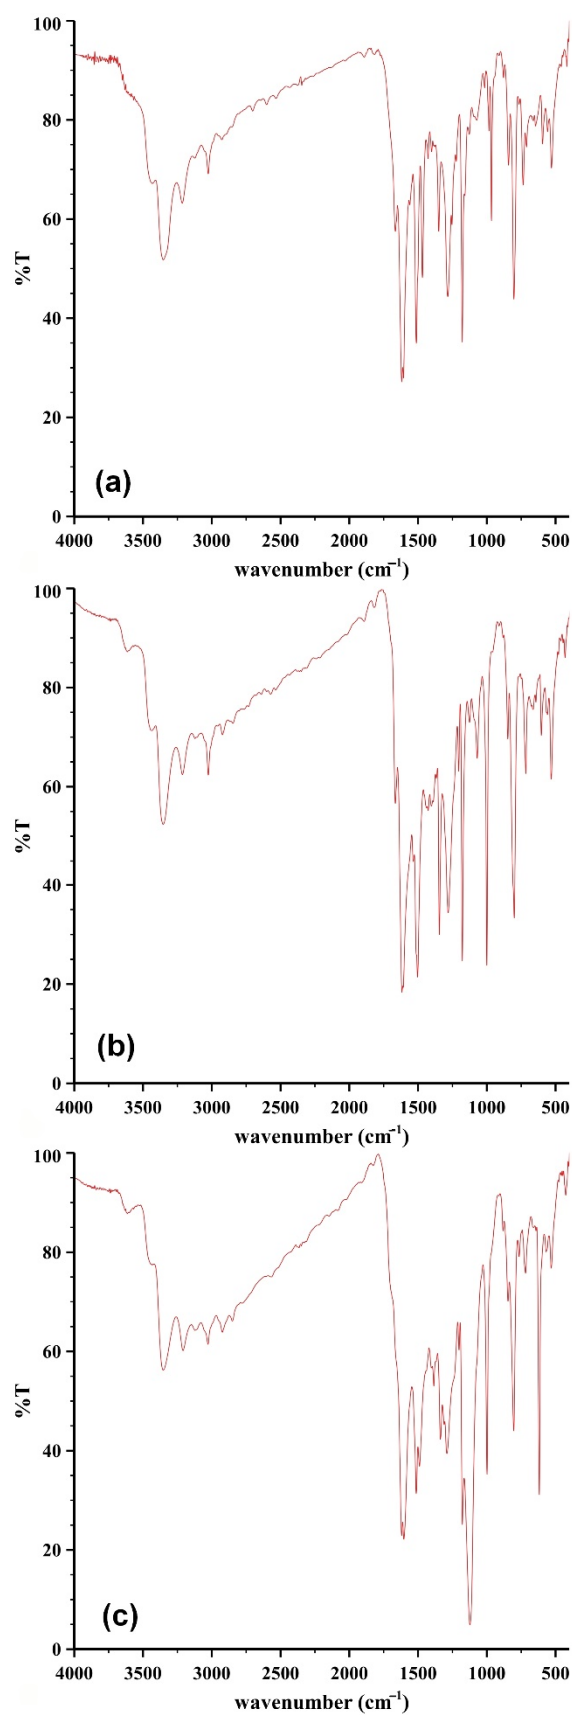

**Figure S3.** FT-IR spectra of the empty porphyrin ring (a), and the complexes with Cu(II) (b), and Fe(II) ions (c).

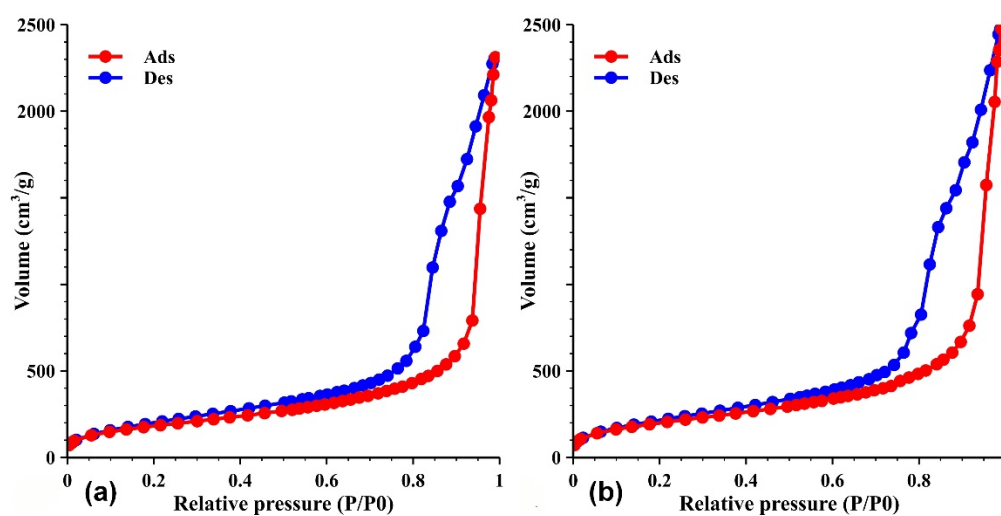

**Figure S4.** Nitrogen adsorption-desorption isotherms of the catalysts denoted as CuPA (a) and the iron-containing one, denoted as FePA (b). The shapes, as expected, are almost perfectly alike.

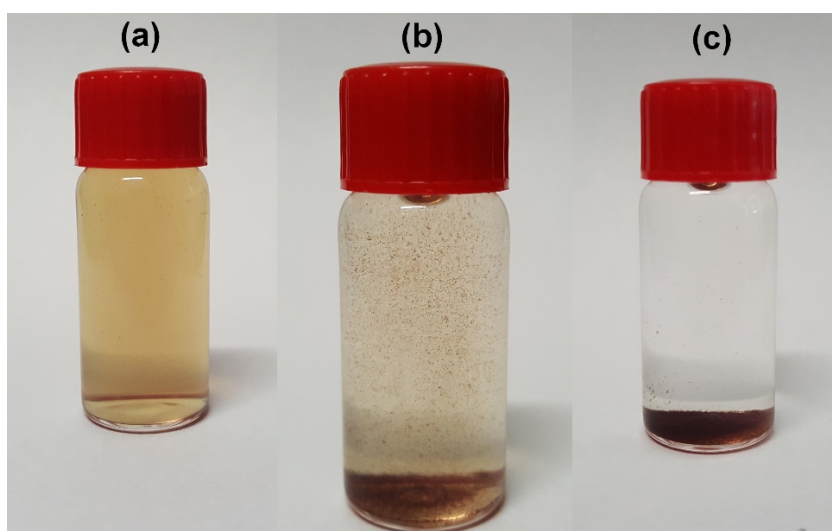

**Figure S5.** Initially the reaction mixture seemed to be homogeneous (a), but after a while without heating solid particles of the porphyrin complex appeared (b), settled down and the solution became colorless (c).

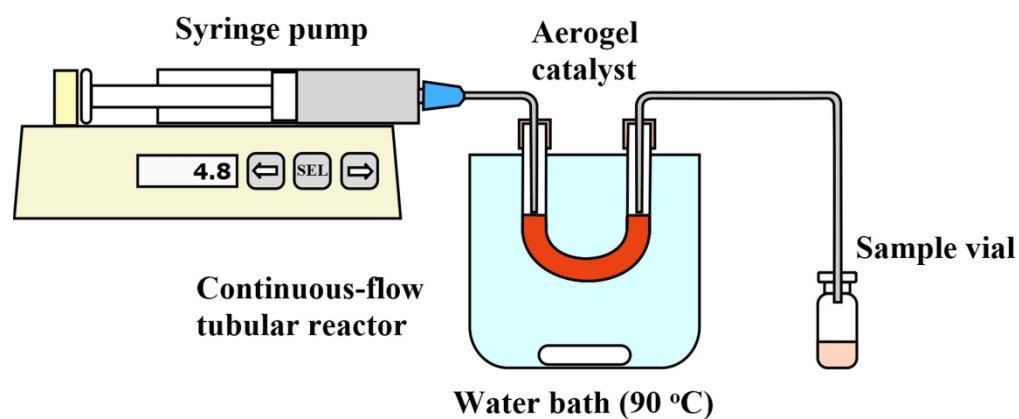

**Figure S6.** Drawing of the continuous-flow tubular reactor for phenol oxidation.
